# Supplementary material for: Antitumor effects and mechanisms of pyropheophorbide-α methyl ester-mediated photodynamic therapy on the human osteosarcoma cell line MG-63
Source: PubMed Central journal article supplement — Int J Mol Med. 2020 Feb 10;45(4):971–82. doi: 10.3892/ijmm.2020.4494 (PMC7053850; doi:10.3892/ijmm.2020.4494), 2020-02-10

Figure S1. Inhibitory effects of different concentrations of MPPa on the viability of human fibroblast HFL-1 cells for 24 h were detected by Cell Counting Kit-8. MPPa, pyropheophorbide- $\alpha$  methyl ester.

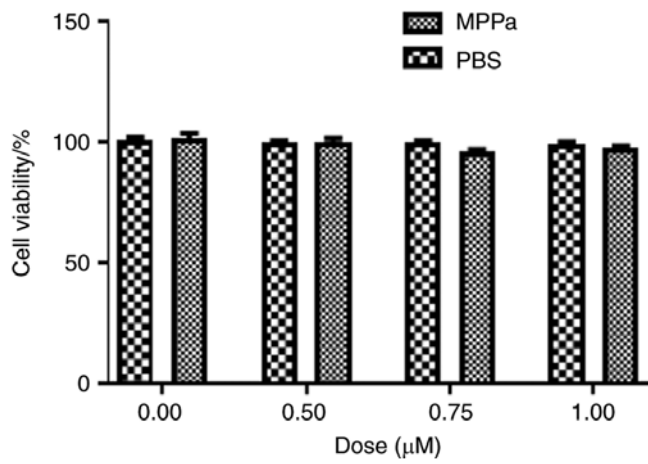

Supplement: Supplementary_Data.pdf [file Supplementary_Data.pdf]
